# Supplementary material for: Ga-doped Ca12Al14O33mayenite oxide ion conductors: synthesis, defects, and electrical properties
Source: Royal Society of Chemistry journal article supplement (doi:10.1039/c8ra08254e), 2019-01-01
Supplement: c8ra08254e1.pdf [file c8ra08254e1.pdf]

## Supplementary information for

### **Ga-doped $\text{Ca}_{12}\text{Al}_{14}\text{O}_{33}$ mayenite oxide ion conductors: synthesis, defects, and electrical properties**

Huaibo Yi<sup>1</sup>, Yun Lv<sup>1</sup>, Yanhui Wang<sup>1</sup>, Xue Fang<sup>1</sup>, Victoria Mattick<sup>2</sup>, Jungu Xu<sup>1,\*</sup>

1. *MOE Key Laboratory of New Processing Technology for Nonferrous Metals and Materials, Guangxi Universities Key Laboratory of Non-ferrous Metal Oxide Electronic Functional Materials and Devices, College of Materials Science and Engineering, Guilin University of Technology, Guilin 541004, P. R. China*
2. *Department of Chemical Engineering, University of South Carolina, Columbia, SC 29201, USA*

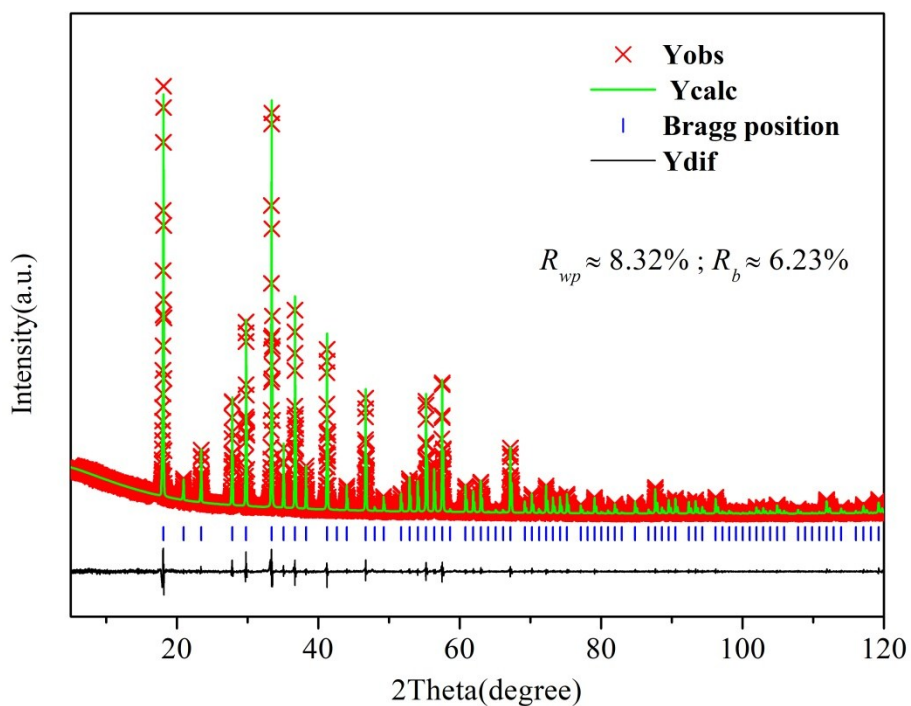

Figure S1. Rietveld fitting plot for the parent  $\text{Ca}_{12}\text{Al}_{14}\text{O}_{33}$ .

Table S1. Final refined structural parameters of parent  $\text{Ca}_{12}\text{Al}_{14}\text{O}_{33}$ . Lattice parameters:  $a = 11.9947(6)$  Å, space group  $\bar{I}43d$ .

| Atom | Site | $x$         | $y$         | $z$         | Occupies  | $B_{\text{iso}}(\text{Å}^2)$ |
|------|------|-------------|-------------|-------------|-----------|------------------------------|
| Ca1  | 24d  | 0.1107(5)   | 0           | 1/4         | 0.862(3)  | 1.45(1)                      |
| Ca2  | 24d  | 0.041(1)    | 0           | 1/4         | 0.138(3)  | 3.0(2)                       |
| Al1  | 12a  | 3/8         | 0           | 1/4         | 1         | 0.37(8)                      |
| Al2  | 16c  | -0.01811(9) | -0.01811(9) | -0.01811(9) | 1         | 0.74(6)                      |
| O1   | 16c  | 0.0609(2)   | 0.0609(2)   | 0.0609(2)   | 1         | 1.6(1)                       |
| O2   | 48e  | 0.1033(2)   | 0.1949(2)   | 0.2874(2)   | 1         | 3.0(1)                       |
| O3   | 48e  | 0.267(9)    | 1.143(5)    | 1.00(1)     | 0.0416(1) | 0.8(1)                       |

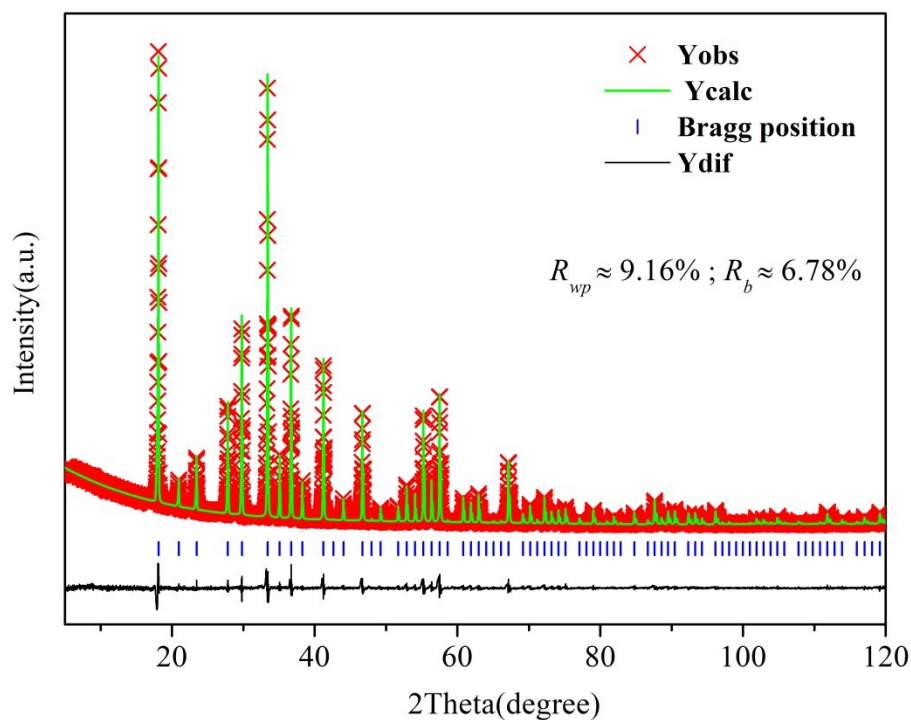

Figure S2. Rietveld fitting plot for the composition  $\text{Ca}_{12}\text{Al}_{13.8}\text{Ga}_{0.2}\text{O}_{33+\delta}$ .

Table S2. Final refined structural parameters of the composition  $\text{Ca}_{12}\text{Al}_{13.8}\text{Ga}_{0.2}\text{O}_{33+\delta}$ . Lattice parameters:  $a = 11.9970(1)$  Å, space group  $\overline{I}4\ 3d$ .

| Atom    | Site | $x$        | $y$        | $z$        | Occupies          | $B_{\text{iso}}(\text{Å}^2)$ |
|---------|------|------------|------------|------------|-------------------|------------------------------|
| Ca1     | 24d  | 0.1063(1)  | 0          | 1/4        | 0.851(3)          | 0.66(5)                      |
| Ca2     | 24d  | 0.039(1)   | 0          | 1/4        | 0.149(3)          | 2.3(3)                       |
| Al1/Ga1 | 12a  | 3/8        | 0          | 1/4        | 0.982(1)/0.018(1) | 2.2(1)                       |
| Al2/Ga2 | 16c  | -0.0155(1) | -0.0155(1) | -0.0155(1) | 0.986(3)/0.014(3) | 2.47(8)                      |
| O1      | 16c  | 0.0613(3)  | 0.0613(3)  | 0.0613(3)  | 1                 | 2.5(2)                       |
| O2      | 48e  | 0.1029(2)  | 0.1918(2)  | 0.2856(2)  | 1                 | 1.34(9)                      |
| O3      | 48e  | 0.26(1)    | 0.164(5)   | 1.009(6)   | 0.0416(1)         | 1.03(2)                      |

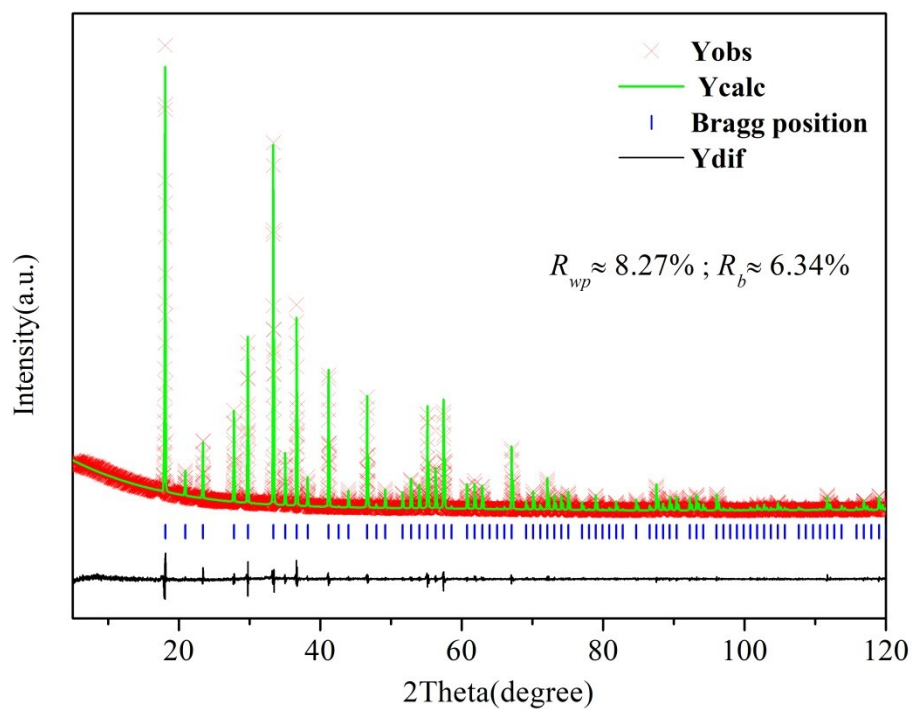

Figure S3. Rietveld fitting plot for the composition  $\text{Ca}_{12}\text{Al}_{13.6}\text{Ga}_{0.4}\text{O}_{33+\delta}$ .

Table S3. Final refined structural parameters of the composition  $\text{Ca}_{12}\text{Al}_{13.6}\text{Ga}_{0.4}\text{O}_{33+\delta}$ . Lattice parameters:  $a = 11.9989(3)$  Å, space group  $\overline{I}4\ 3d$ .

| Atom    | Site | $x$        | $y$        | $z$        | Occupies          | $B_{\text{iso}}(\text{Å}^2)$ |
|---------|------|------------|------------|------------|-------------------|------------------------------|
| Ca1     | 24d  | 0.1062(4)  | 0          | 1/4        | 0.849(4)          | 0.66(7)                      |
| Ca2     | 24d  | 0.040(6)   | 0          | 1/4        | 0.151(4)          | 2.3(1)                       |
| Al1/Ga1 | 12a  | 3/8        | 0          | 1/4        | 0.966(1)/0.034(1) | 2.2(1)                       |
| Al2/Ga2 | 16c  | -0.0162(1) | -0.0162(1) | -0.0162(1) | 0.974(2)/0.026(2) | 2.4(1)                       |
| O1      | 16c  | 0.0578(3)  | 0.0578(3)  | 0.0578(3)  | 1                 | 1.2(1)                       |
| O2      | 48e  | 0.1033(3)  | 0.1924(1)  | 0.2871(4)  | 1                 | 0.56(3)                      |
| O3      | 48e  | 0.255(3)   | 0.161(8)   | 1.03(2)    | 0.0416(1)         | 2.53(2)                      |

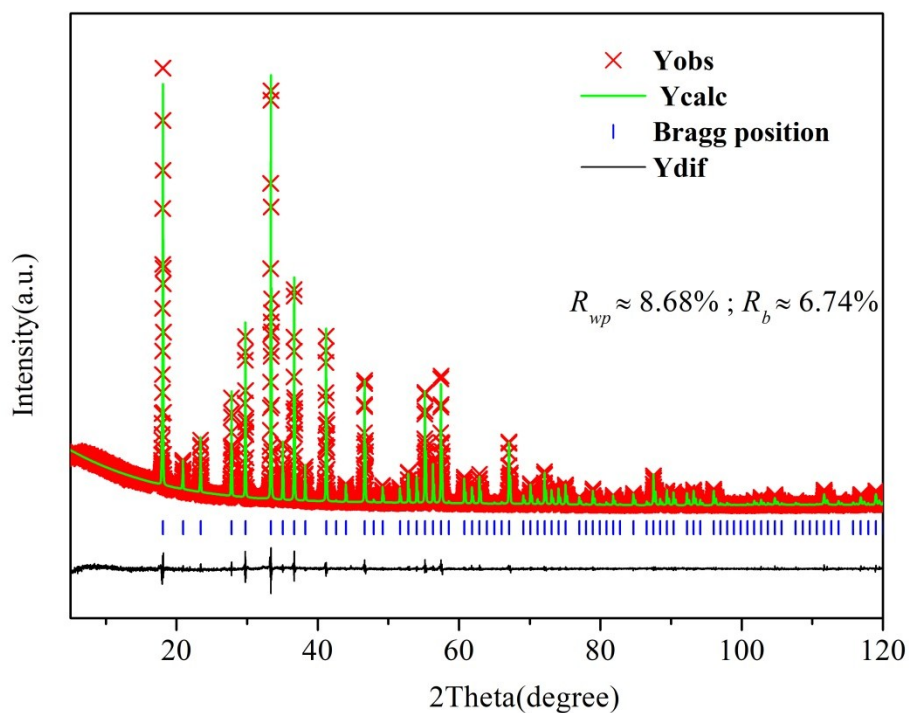

Figure S4. Rietveld fitting plot for the composition  $\text{Ca}_{12}\text{Al}_{13.4}\text{Ga}_{0.6}\text{O}_{33+\delta}$ .

Table S4. Final refined structural parameters of the composition  $\text{Ca}_{12}\text{Al}_{13.4}\text{Ga}_{0.6}\text{O}_{33+\delta}$ . Lattice parameters:  $a = 12.0026(1)$  Å, space group  $I\bar{4}3d$ .

| Atom    | Site | $x$        | $y$        | $z$        | Occupies          | $B_{\text{iso}}(\text{Å}^2)$ |
|---------|------|------------|------------|------------|-------------------|------------------------------|
| Ca1     | 24d  | 0.1061(3)  | 0          | 1/4        | 0.847(1)          | 0.73(3)                      |
| Ca2     | 24d  | 0.044(8)   | 0          | 1/4        | 0.153(1)          | 2.3(2)                       |
| Al1/Ga1 | 12a  | 3/8        | 0          | 1/4        | 0.957(1)/0.043(1) | 1.39(5)                      |
| Al2/Ga2 | 16c  | -0.0164(1) | -0.0164(1) | -0.0164(1) | 0.954(3)/0.046(3) | 2.69(7)                      |
| O1      | 16c  | 0.0600(3)  | 0.0600(3)  | 0.0600(3)  | 1                 | 0.9(1)                       |
| O2      | 48e  | 0.1014(2)  | 0.1882(3)  | 0.2847(2)  | 1                 | 2.36(8)                      |
| O3      | 48e  | 0.2(1)     | 1.095(3)   | 0.99(7)    | 0.0416(1)         | 1.65(5)                      |

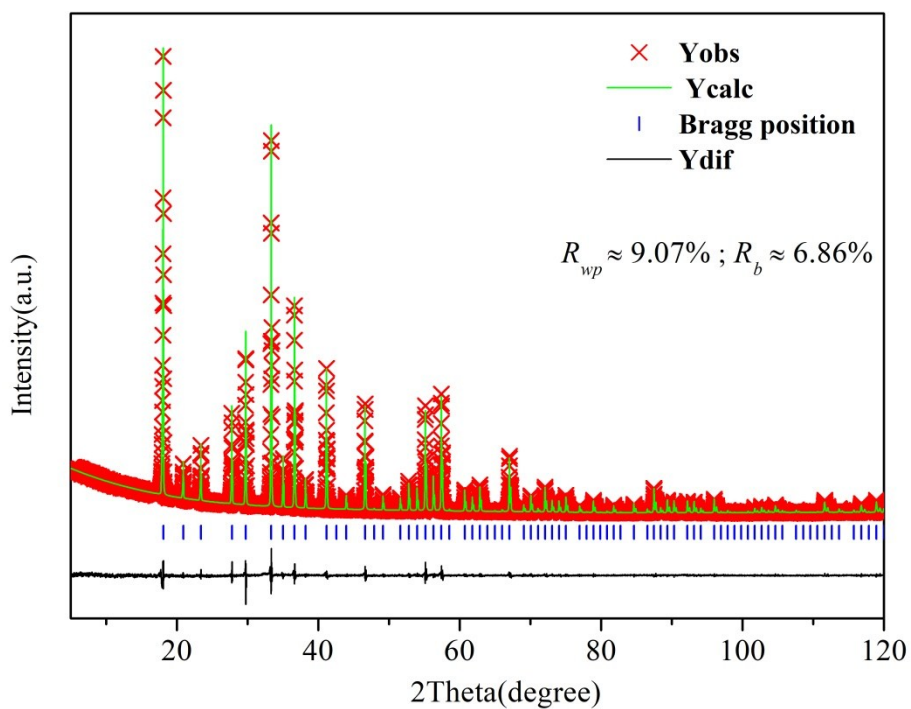

Figure S5. Rietveld fitting plot for the composition  $\text{Ca}_{12}\text{Al}_{13.2}\text{Ga}_{0.8}\text{O}_{33+\delta}$ .

Table S5. Final refined structural parameters of the composition  $\text{Ca}_{12}\text{Al}_{13.2}\text{Ga}_{0.8}\text{O}_{33+\delta}$ . Lattice parameters:  $a = 12.0039(7)$  Å, space group  $\overline{I}4\ 3d$ .

| Atom    | Site | $x$        | $y$        | $z$        | Occupies          | $B_{\text{iso}}(\text{Å}^2)$ |
|---------|------|------------|------------|------------|-------------------|------------------------------|
| Ca1     | 24d  | 0.1081(6)  | 0          | 1/4        | 0.849(2)          | 0.34(5)                      |
| Ca2     | 24d  | 0.037(1)   | 0          | 1/4        | 0.151(2)          | 2.2(1)                       |
| Al1/Ga1 | 12a  | 3/8        | 0          | 1/4        | 0.945(1)/0.055(1) | 1.4(1)                       |
| Al2/Ga2 | 16c  | -0.0159(1) | -0.0159(1) | -0.0159(1) | 0.944(1)/0.056(1) | 2.3(1)                       |
| O1      | 16c  | 0.0595(3)  | 0.0595(3)  | 0.0595(3)  | 1                 | 1.4(1)                       |
| O2      | 48e  | 0.1023(2)  | 0.1873(2)  | 0.2867(1)  | 1                 | 2.89(7)                      |
| O3      | 48e  | 0.25(1)    | 1.125(4)   | 1.023(7)   | 0.0416(1)         | 1.21(1)                      |

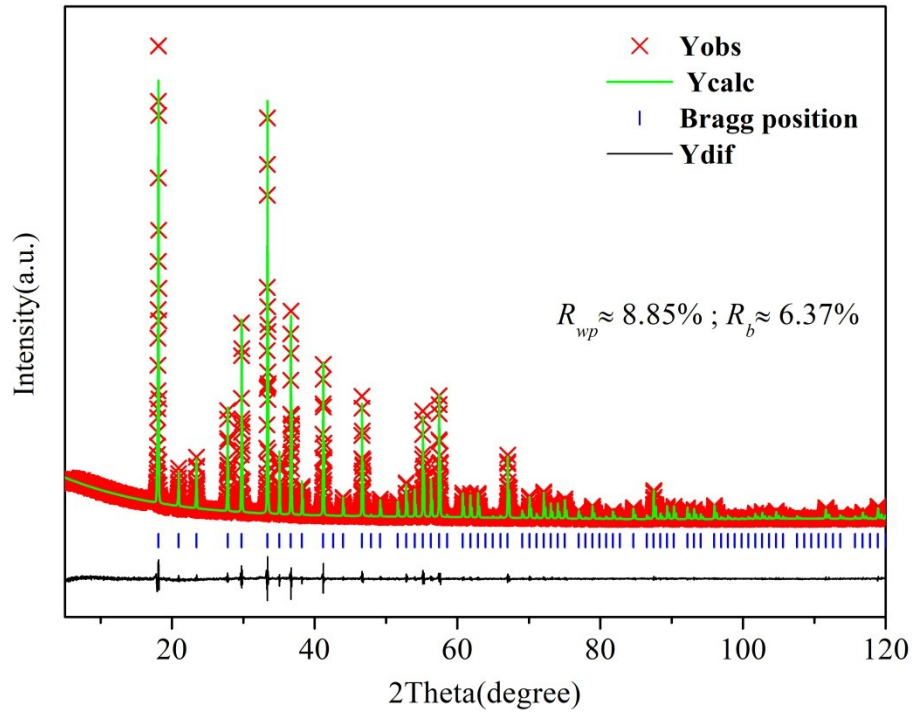

Figure S6. Rietveld fitting plot for the composition  $\text{Ca}_{12}\text{Al}_{13.0}\text{Ga}_{1.0}\text{O}_{33+\delta}$ .

Table S6. Final refined structural parameters of the composition  $\text{Ca}_{12}\text{Al}_{13.0}\text{Ga}_{1.0}\text{O}_{33+\delta}$ . Lattice parameters:  $a = 12.0066(1)$  Å, space group  $I\bar{4}3d$ .

| Atom    | Site | $x$        | $y$        | $z$        | Occupies          | $B_{\text{iso}}(\text{Å}^2)$ |
|---------|------|------------|------------|------------|-------------------|------------------------------|
| Ca1     | 24d  | 0.1065(4)  | 0          | 1/4        | 0.837(1)          | 0.50(6)                      |
| Ca2     | 24d  | 0.034(1)   | 0          | 1/4        | 0.163(1)          | 0.92(7)                      |
| Al1/Ga1 | 12a  | 3/8        | 0          | 1/4        | 0.928(2)/0.072(2) | 1.63(1)                      |
| Al2/Ga2 | 16c  | -0.0167(1) | -0.0167(1) | -0.0167(1) | 0.932(1)/0.068(1) | 2.42(1)                      |
| O1      | 16c  | 0.0577(3)  | 0.0577(3)  | 0.0577(3)  | 1                 | 2.6(2)                       |
| O2      | 48e  | 0.1027(2)  | 0.1888(2)  | 0.2859(2)  | 1                 | 1.31(1)                      |
| O3      | 48e  | 0.245(9)   | 1.135(4)   | 0.99(1)    | 0.0416(1)         | 2.13(1)                      |

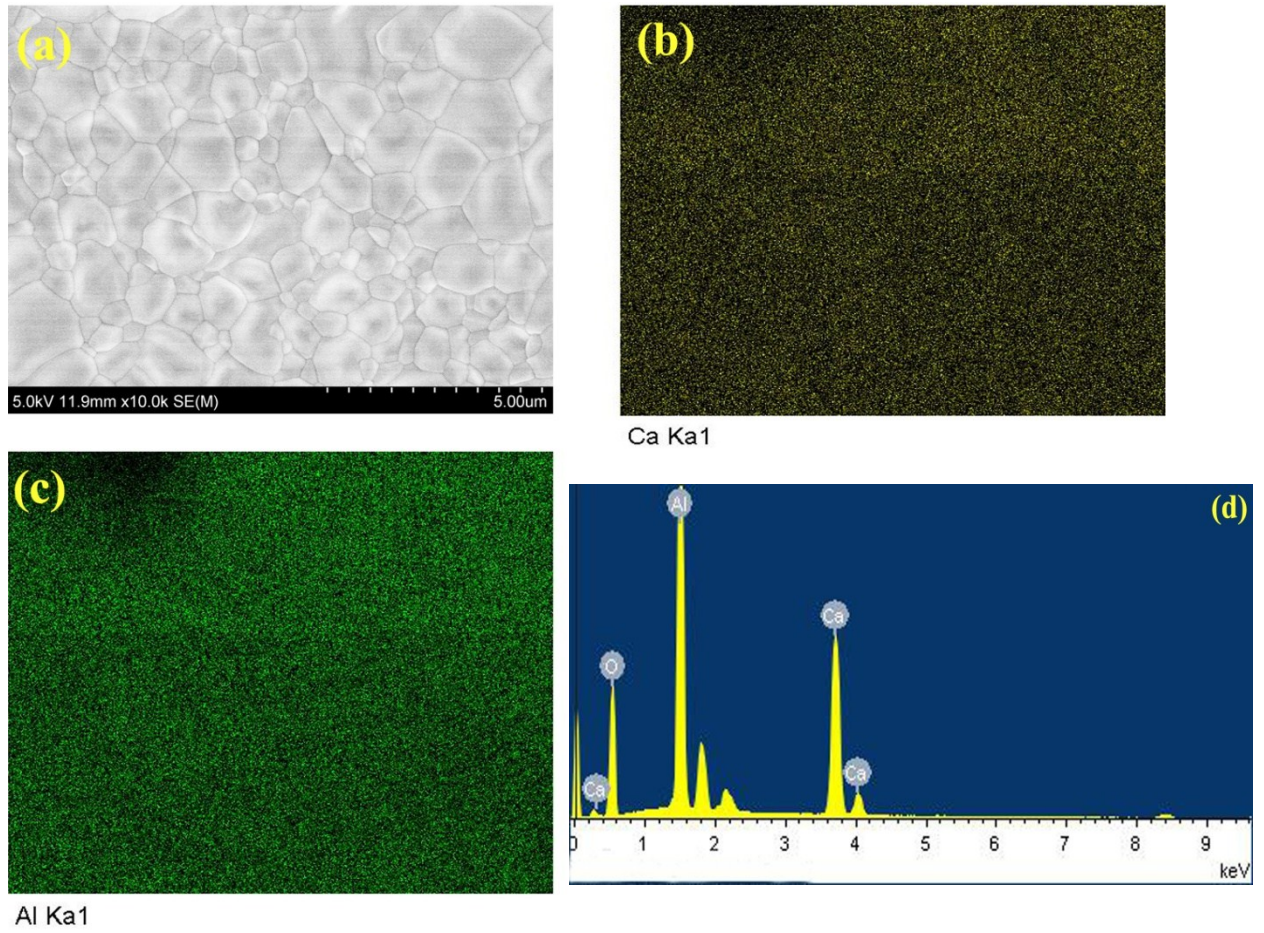

**Figure S7.** SEM micrograph of parent  $\text{Ca}_{12}\text{Al}_{14}\text{O}_{33}$  (a), and EDS element distribution maps of Ca (b), Al (c); picture (d) shows the element concentrations, the un-labeled peak is ascribed to the Au element that sprayed on the surface of the ceramic pellet before measurements. The relative element ratio for Ca : Al was revealed to be 12 : 14.3.



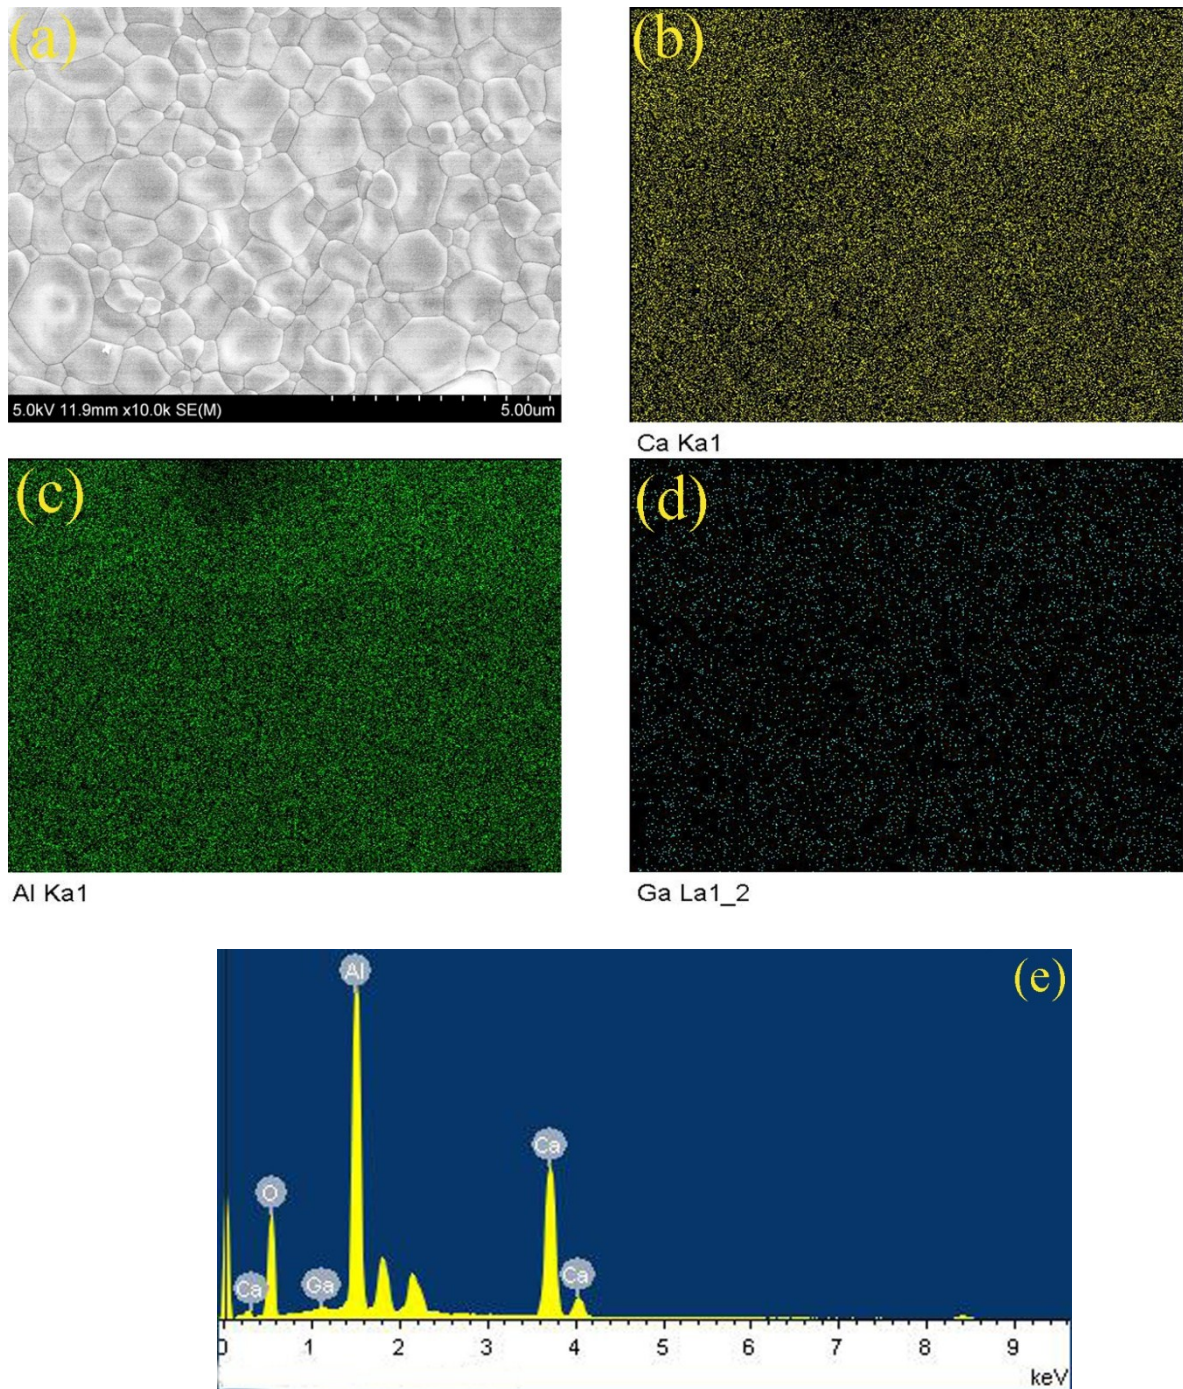

**Figure S8.** SEM micrograph of the composition  $\text{Ca}_{12}\text{Al}_{13.8}\text{Ga}_{0.2}\text{O}_{33}$  (a), and EDS element distribution maps of Ca (b), Al (c), and Ga (d) ; picture (e) shows the element concentrations, the un-labeled peak is ascribed to the Au element that sprayed on the surface of the ceramic pellet before measurements. The relative element ratios for Ca : Al : Ga were revealed to be 12 : 13.74 : 0.23 .

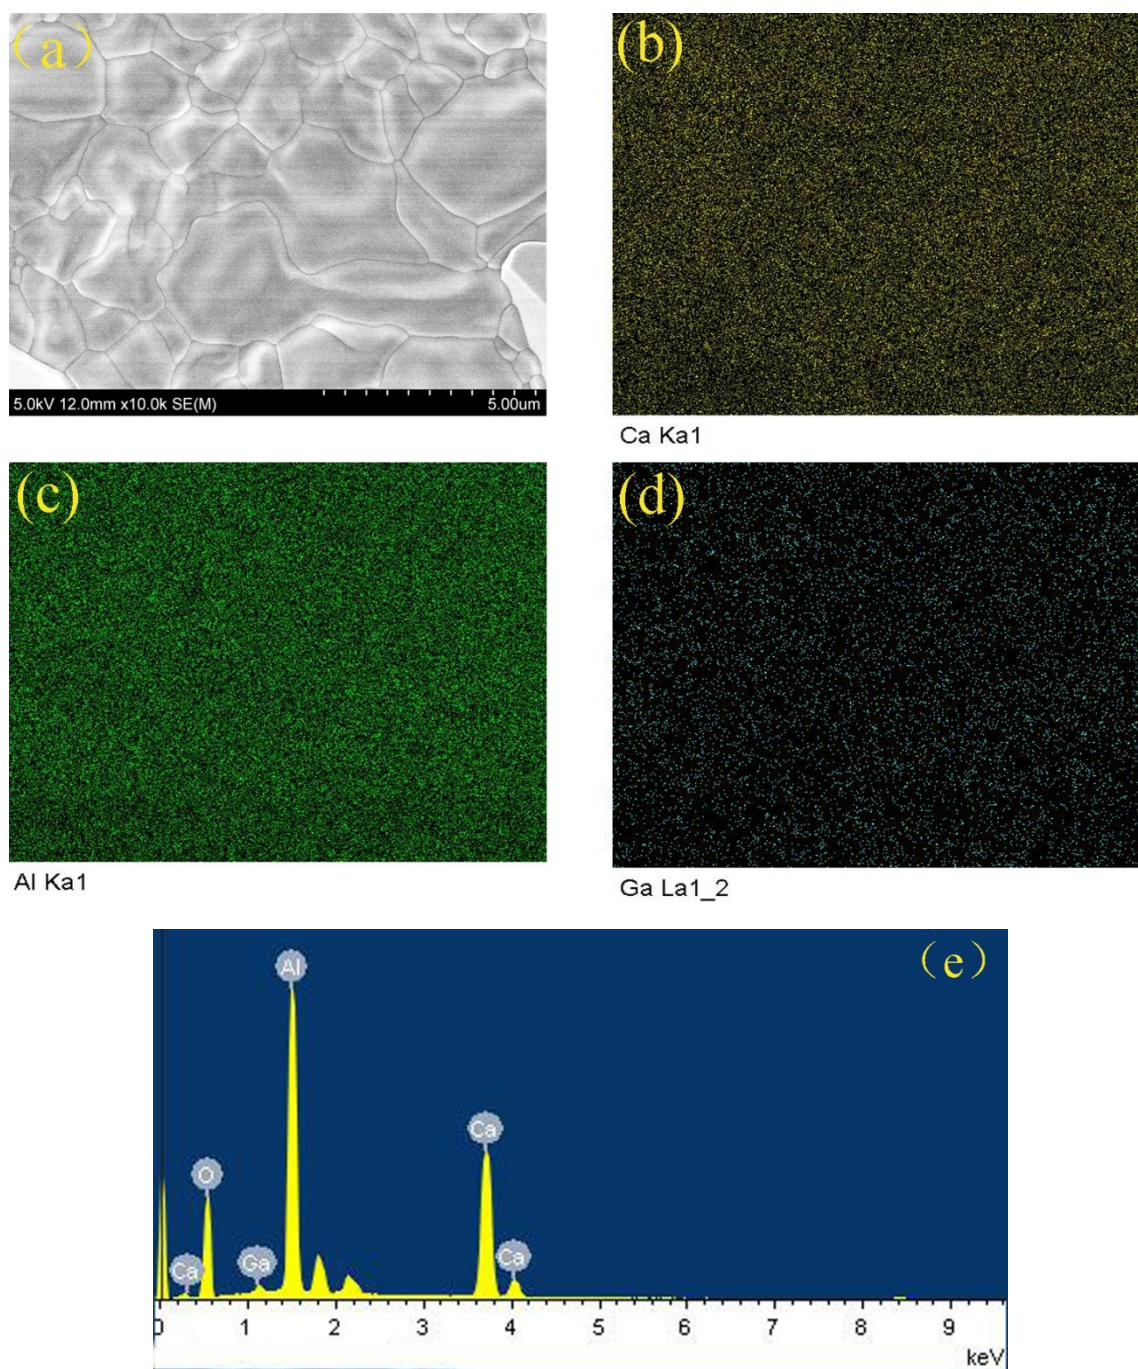

**Figure S9.** SEM micrograph of the composition  $\text{Ca}_{12}\text{Al}_{13.6}\text{Ga}_{0.4}\text{O}_{33}$  (a), and EDS element distribution maps of Ca (b), Al (c), and Ga (d) ; picture (e) shows the element concentrations, the un-labeled peak is ascribed to the Au element that sprayed on the surface of the ceramic pellet before measurements. The relative element ratios for Ca : Al : Ga were revealed to be 12 : 13.65 : 0.36

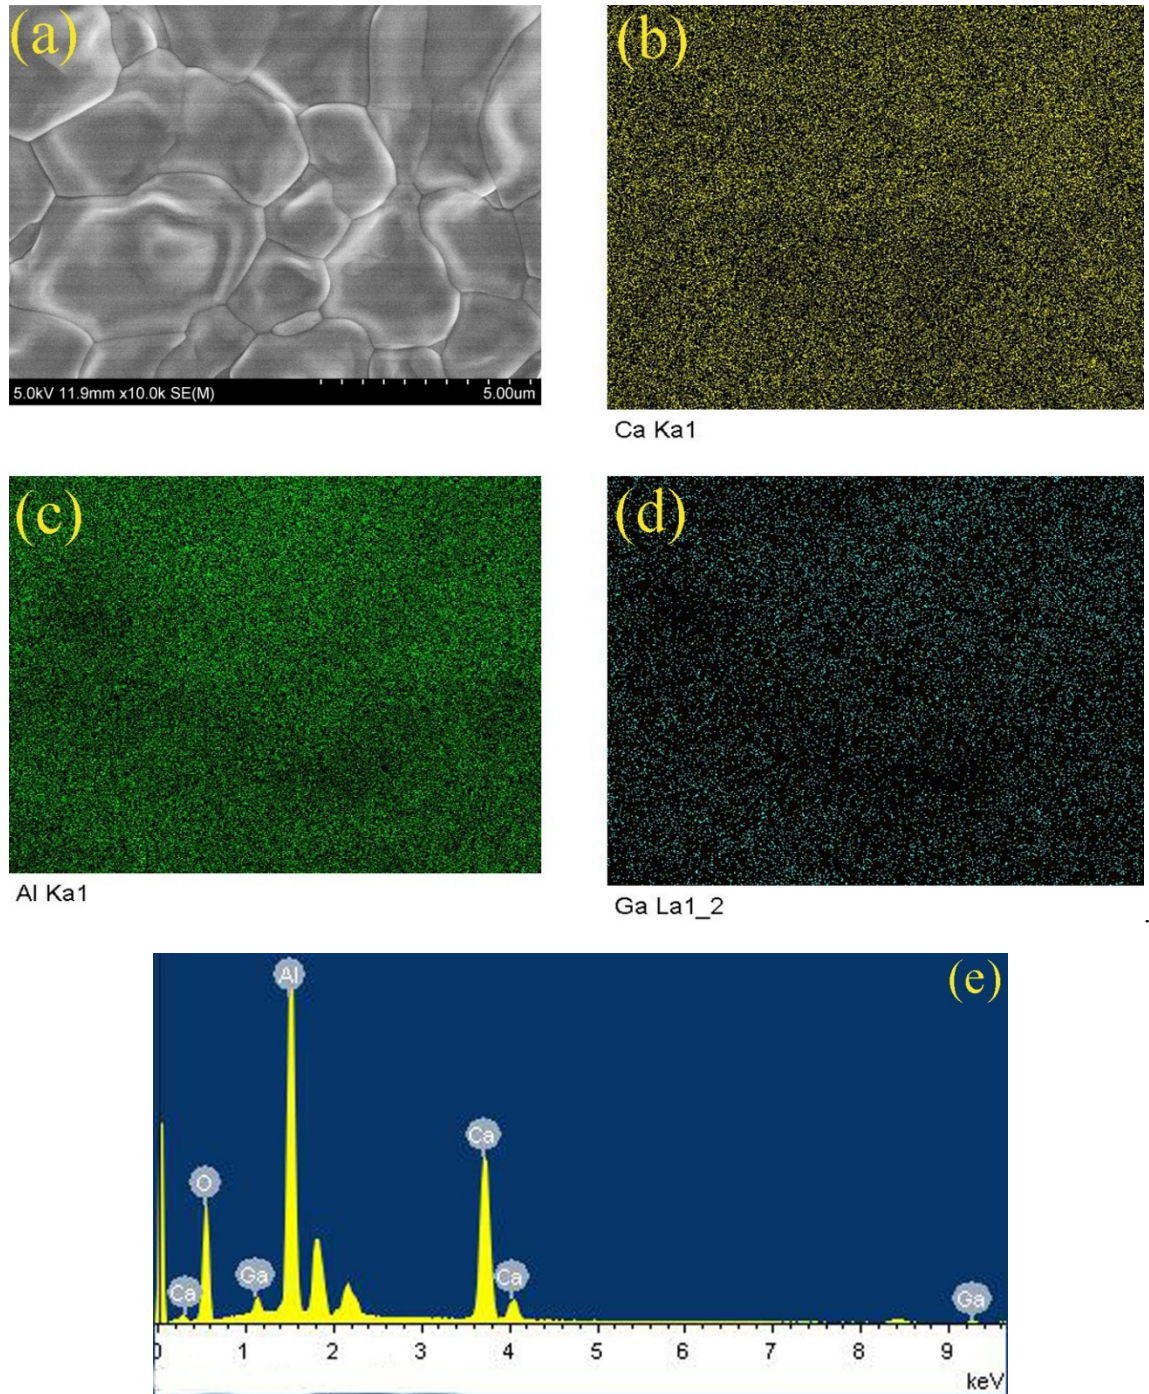

**Figure S10.** SEM micrograph of the composition  $\text{Ca}_{12}\text{Al}_{13.4}\text{Ga}_{0.6}\text{O}_{33}$  (a), and EDS element distribution maps of Ca (b), Al (c), and Ga (d) ; picture (e) shows the element concentrations, the un-labeled peak is ascribed to the Au element that sprayed on the surface of the ceramic pellet before measurements. The relative element ratios for Ca : Al : Ga were revealed to be 12 : 13.37 : 0.62

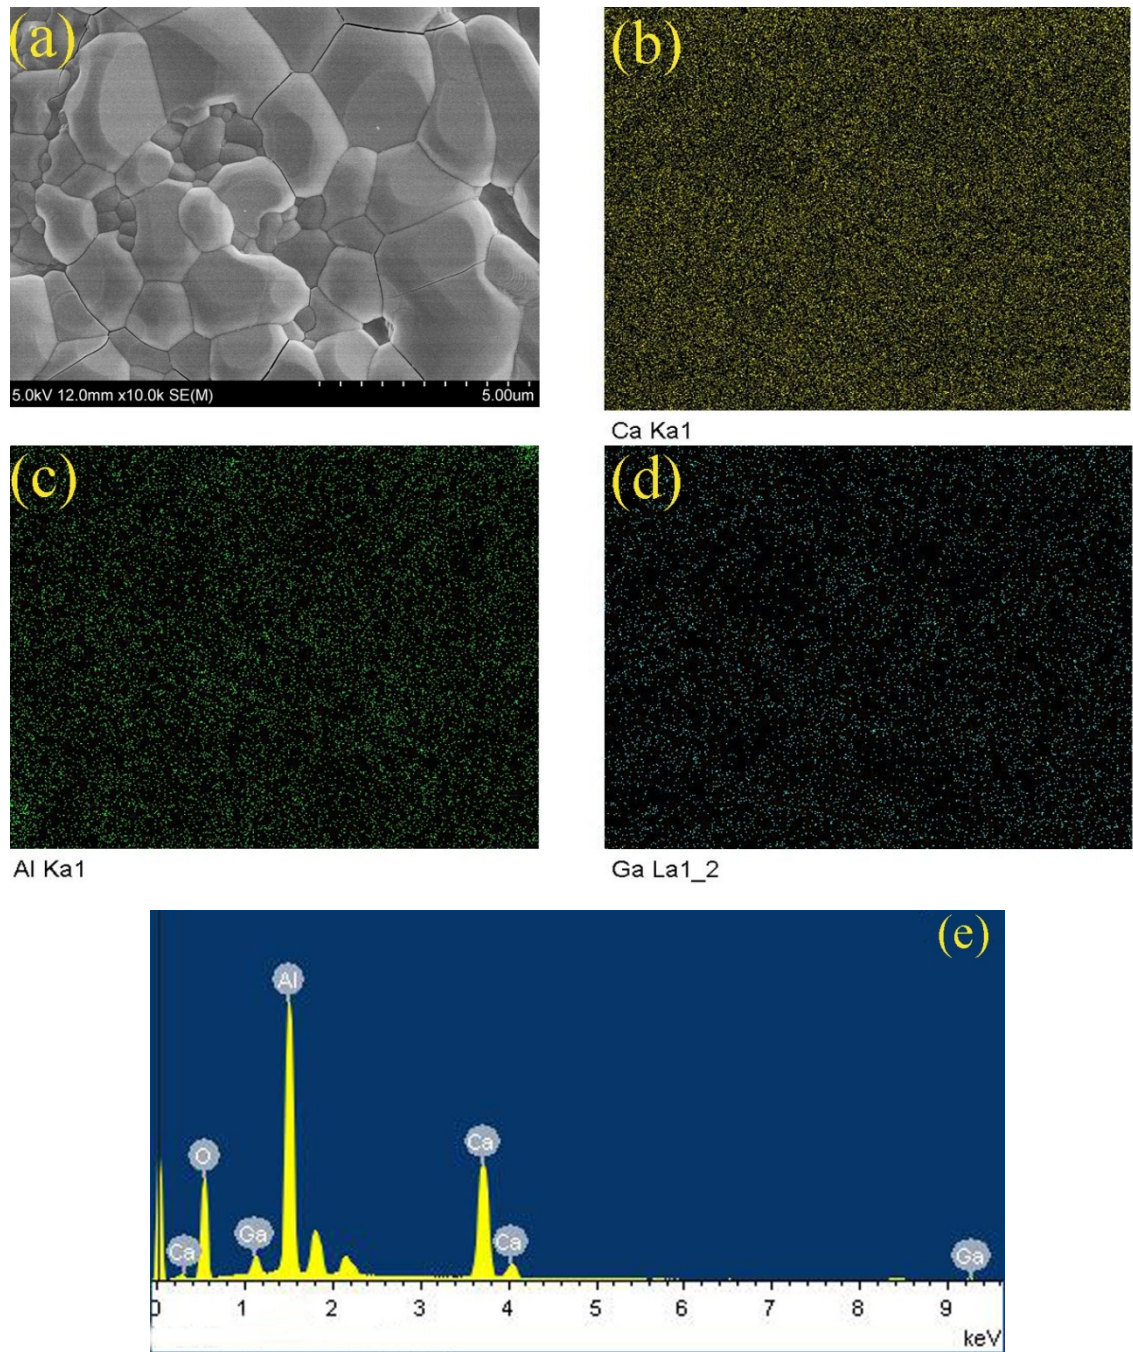

**Figure S11.** SEM micrograph of the composition  $\text{Ca}_{12}\text{Al}_{13.2}\text{Ga}_{0.8}\text{O}_{33}$  (a), and EDS element distribution maps of Ca (b), Al (c), and Ga (d) ; picture (e) shows the element concentrations, the un-labeled peak is ascribed to the Au element that sprayed on the surface of the ceramic pellet before measurements. The relative element ratios for Ca : Al : Ga were revealed to be 12 : 13.14 : 0.81

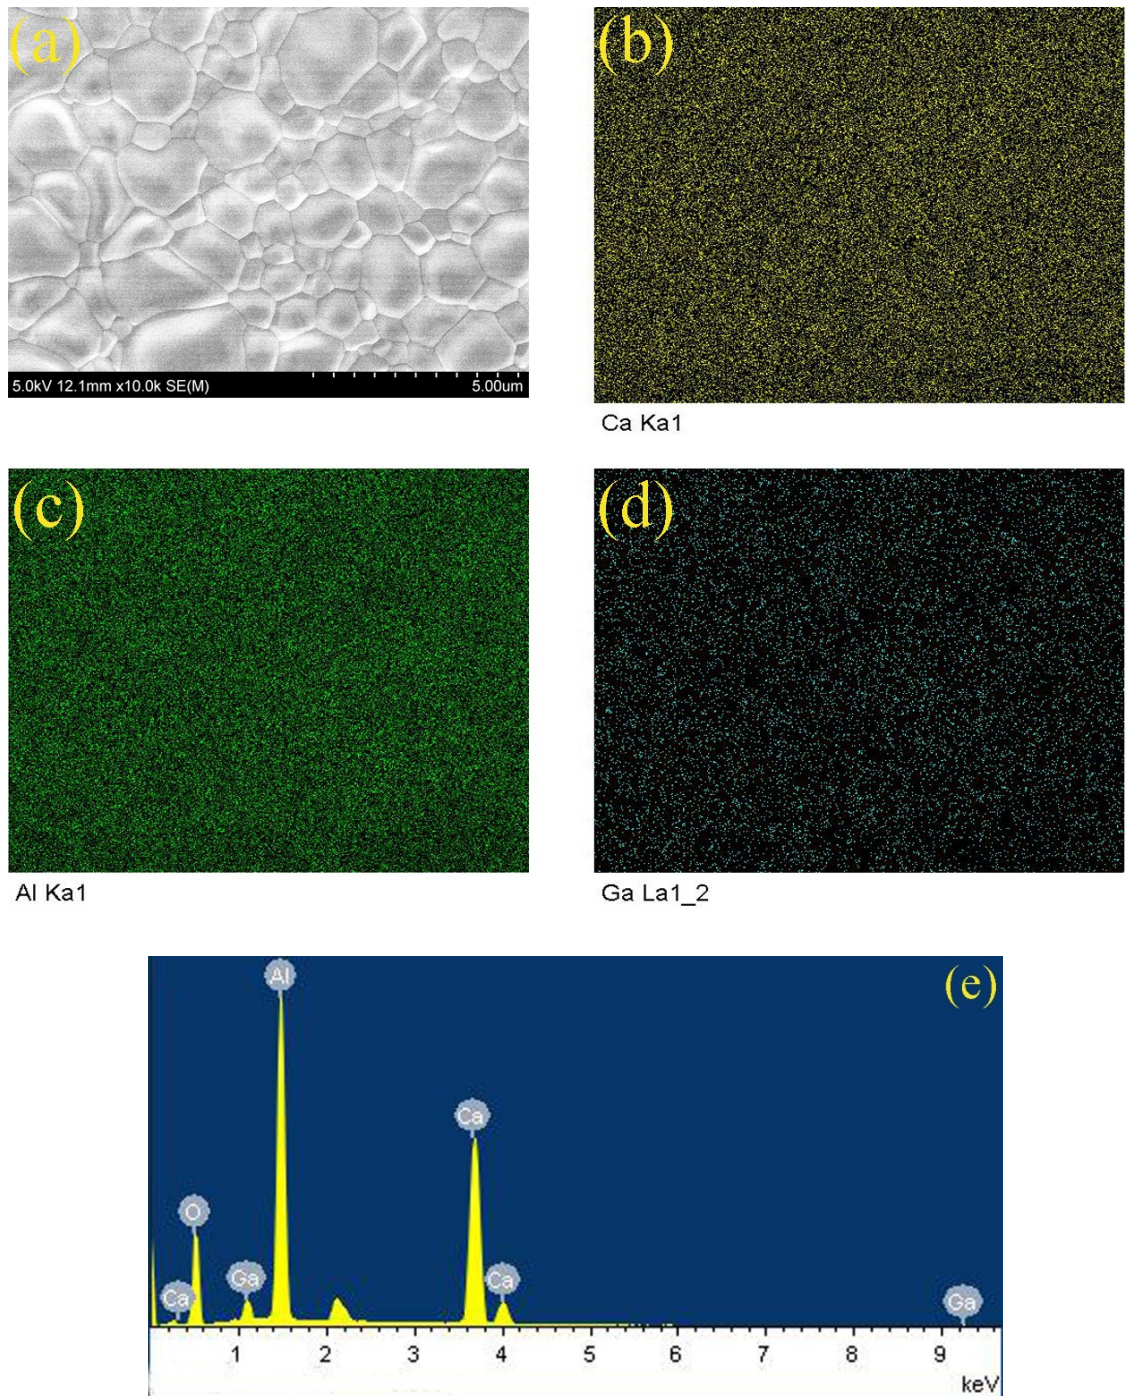

**Figure S12.** SEM micrograph of the composition  $\text{Ca}_{12}\text{Al}_{13.0}\text{Ga}_{1.0}\text{O}_{33}$  (a), and EDS element distribution maps of Ca (b), Al (c), and Ga (d) ; picture (e) shows the element concentrations, the un-labeled peak is ascribed to the Au element that sprayed on the surface of the ceramic pellet before measurements. The relative element ratios for Ca : Al : Ga were revealed to be 12 : 13.11 : 0.92

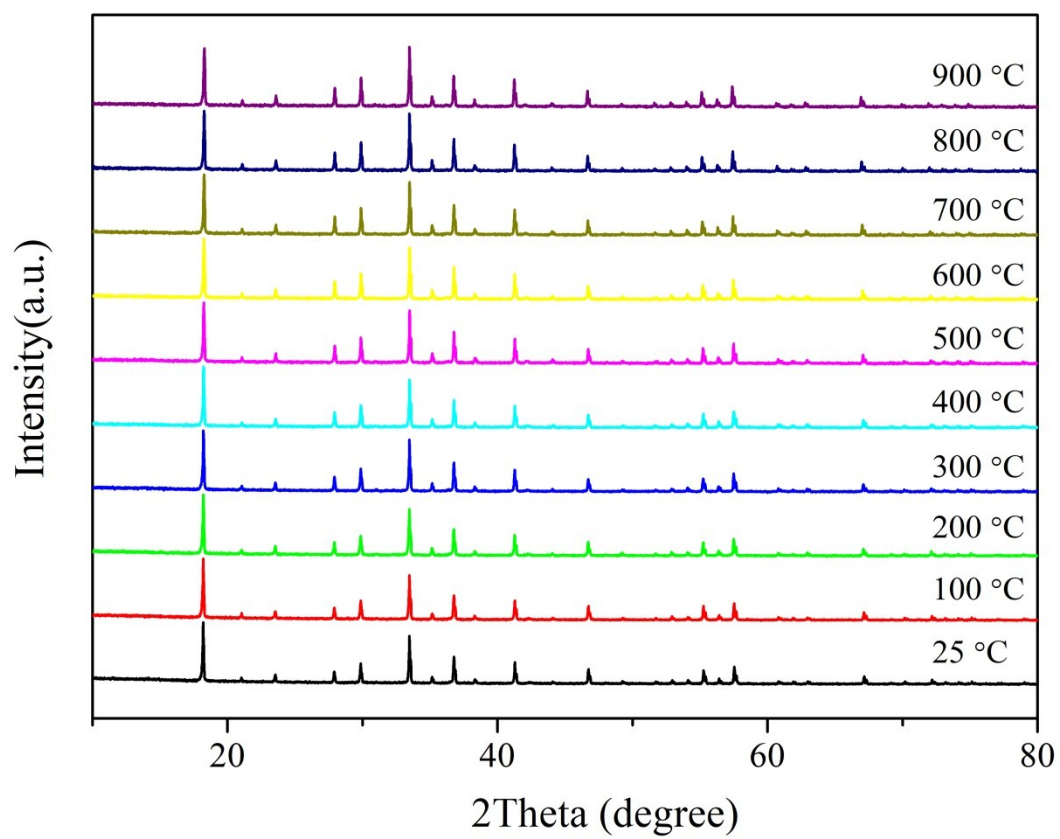

**Figure S13.** In-situ VT-XRD patterns of the sample  $x = 0.4$
